# Supplementary material
Source: PubMed Central journal article supplement (PMC5292726)
Supplement: NIHMS843701-supplement-1.pdf [file NIHMS843701-supplement-1.pdf]

# SUPPORTING INFORMATION

## Preincubation of t-SNAREs with Complexin I Increases Content-Mixing Efficiency

*Jaewook Kim<sup>#</sup>, Yicheng Zhu<sup>#</sup> and Yeon-Kyun Shin<sup>\*</sup>*

Department of Biochemistry, Biophysics, and Molecular Biology, Iowa State University, Ames,  
IA, 50011, United States

<sup>#</sup> These authors contributed equally to this work and should be considered as co-first authors.

**Corresponding Author:** Yeon-Kyun Shin, Department of Biochemistry, Biophysics, and  
Molecular Biology, Iowa State University, Ames, IA, 50011, United States; E- mail:  
colishin@iastate.edu

Supplemental Figure S1

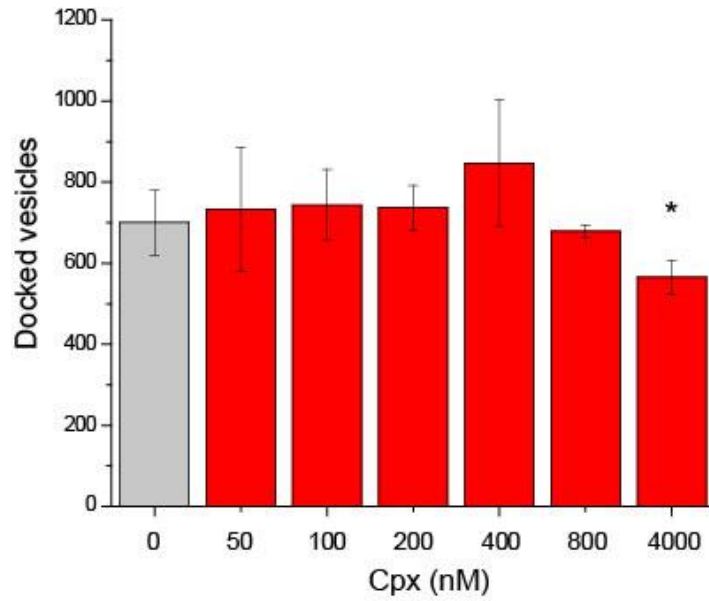

**Figure S1. Figure Caption. Vesicle docking is not significantly affected by Cpx.** Histogram of the docked v-vesicles harboring both VAMP2 and Syt1 at various concentrations of Cpx. Error bars denote the S.D. of three independent experiments with 5 randomly selected screens shots. Statistical significance was analyzed by the Student's t-test comparing Cpx concentration with no Cpx; \*P < 0.05.
